# Supplementary material for: Simultaneous induction of high level thermal and visible-light catalytic activities to titanium(iv) oxide by surface modification with cobalt(iii) oxide clusters
Source: Royal Society of Chemistry journal article supplement (doi:10.1039/c3cp54304h), 2013-01-01
Supplement: c3cp54304h.pdf [file c3cp54304h.pdf]

# Simultaneous Induction of High Level Thermo- and Visible Light-Catalytic Activities to Titanium(IV) Oxide by Surface Modification with Cobalt(III) Oxide Clusters

Qiliang Jin, Hironori Yamamoto, Kotaro Yamamoto, Musashi Fujishima, and Hiroaki Tada \*

Department of Applied Chemistry, School of Science and Engineering, Kinki University, 3-4-1, Kowakae, Higashi-Osaka, Osaka 577-8502, Japan

## Experimental

**Conversion of 2-naphthol to CO<sub>2</sub>:** In both the thermocatalytic and photocatalytic reactions, TiO<sub>2</sub> or Co<sub>2</sub>O<sub>3</sub>/TiO<sub>2</sub> (0.25 g) was added to an aqueous solution of 1 mmol dm<sup>-3</sup> 2-naphthol (10 mL). The suspension was placed in a glass test tube (30 mL). In the dark reaction, the temperature was maintained at 323 K. In the photocatalytic reaction, the test tube was irradiated with a Xe lamp (Wacom XRD-501SW) through a high pass filter (L-42, Toshiba) to cut off UV-light ( $I_{420-480\text{ nm}} = 4.0\text{ mW cm}^{-2}$ ) at 298 K. The CO<sub>2</sub> dissolved in the solution was liberated into the gas phase by adding 0.1 mL sulfuric acid, and then the amount of CO<sub>2</sub> was quantified by gas chromatography (GC-2014, Shimadzu) with methanizer (MTN-1, Shimadzu) [measurement conditions: column = Porapak-Q 80-100 (GL science); N<sub>2</sub> flow rate = 50 mL min<sup>-1</sup>].

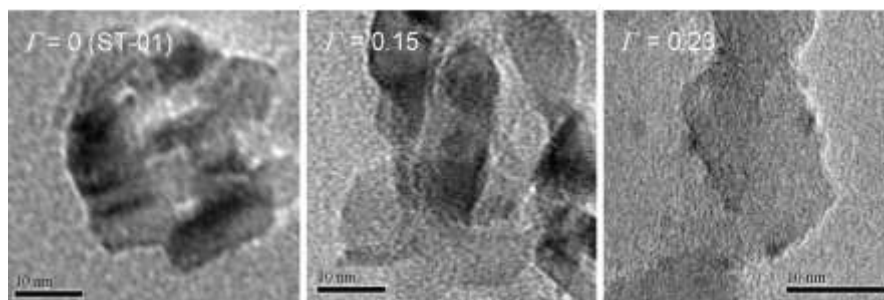

**Fig. S1** TEM images of Co<sub>2</sub>O<sub>3</sub>/TiO<sub>2</sub> with  $\Gamma = 0, 0.15$ , and  $0.23$ .

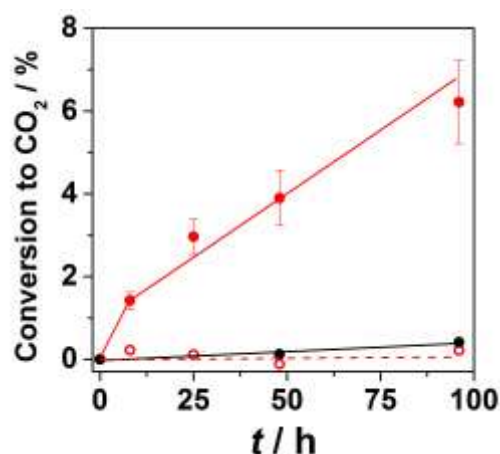

**Fig. S2** Time courses for the CO<sub>2</sub> generation in the thermocatalytic reaction in the dark at 323 K in the presence of Co<sub>2</sub>O<sub>3</sub>( $\Gamma = 0.17$ )/TiO<sub>2</sub> with (red solid circle) and without (red open circle) 2-naphthol, and in the presence of TiO<sub>2</sub> with 2-naphthol (black solid circle).

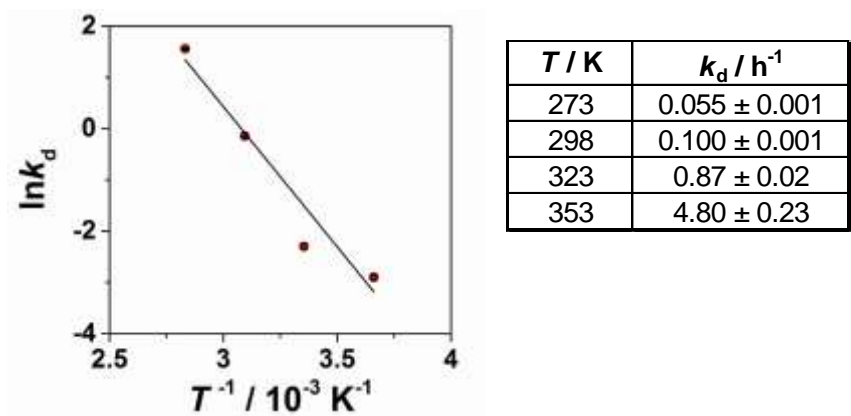

**Fig. S3** Arrhenius plot for the  $\text{Co}_2\text{O}_3(\Gamma = 0.17)/\text{TiO}_2$ -thermocatalyzed degradation of 2-naphthol (left), and numerical values are shown in the right table.

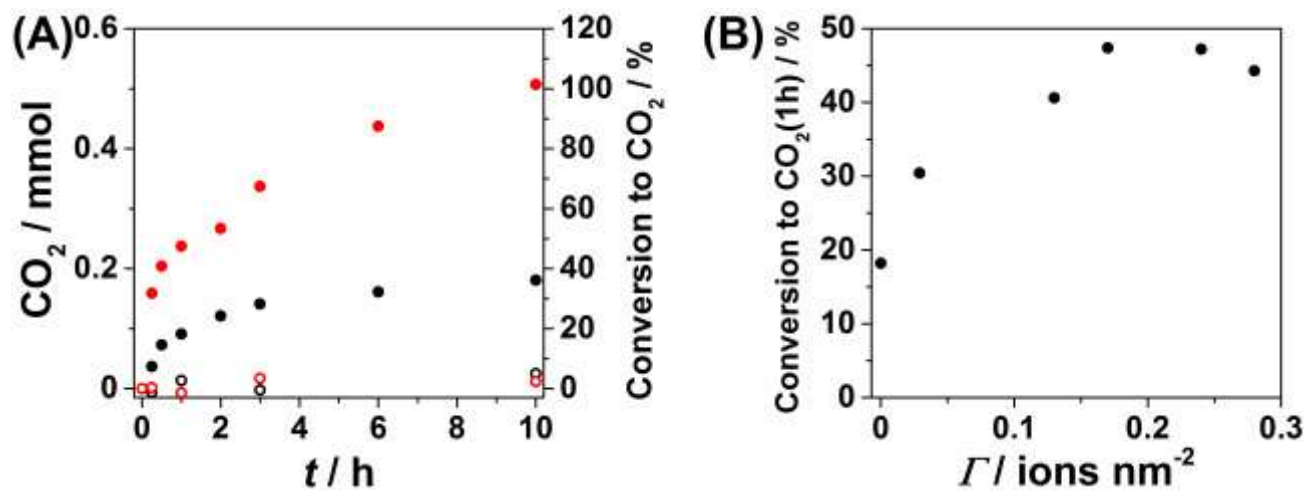

**Fig. S4** (A) Time courses for the  $\text{CO}_2$  generation in the thermocatalytic degradation of formic acid in the dark at 323 K in the presence of  $\text{TiO}_2$  (black solid circle) and  $\text{Co}_2\text{O}_3(\Gamma = 0.17)/\text{TiO}_2$  (red solid circle), and in the presence of  $\text{TiO}_2$  (black open circle) and  $\text{Co}_2\text{O}_3(\Gamma = 0.17)/\text{TiO}_2$  (red open circle) without formic acid. (B) Plots of conversion to  $\text{CO}_2$  at 1 h vs.  $\Gamma$ .

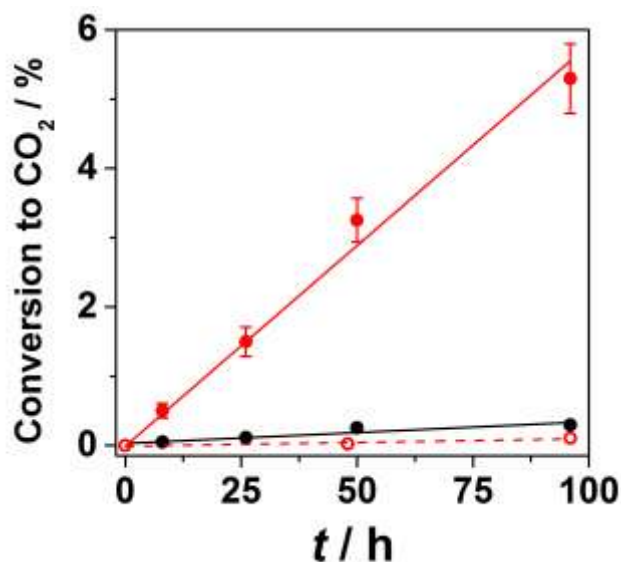

**Fig. S5** Time courses for the  $\text{CO}_2$  generation in the 2-naphthol degradation under visible-light irradiation at 298 K in the presence of  $\text{TiO}_2$  (black solid circle) and  $\text{Co}_2\text{O}_3(\Gamma = 0.17)/\text{TiO}_2$  (red solid circle). Plot (red open circle) is the data for  $\text{Co}_2\text{O}_3(\Gamma = 0.17)/\text{TiO}_2$  without 2-naphthol.

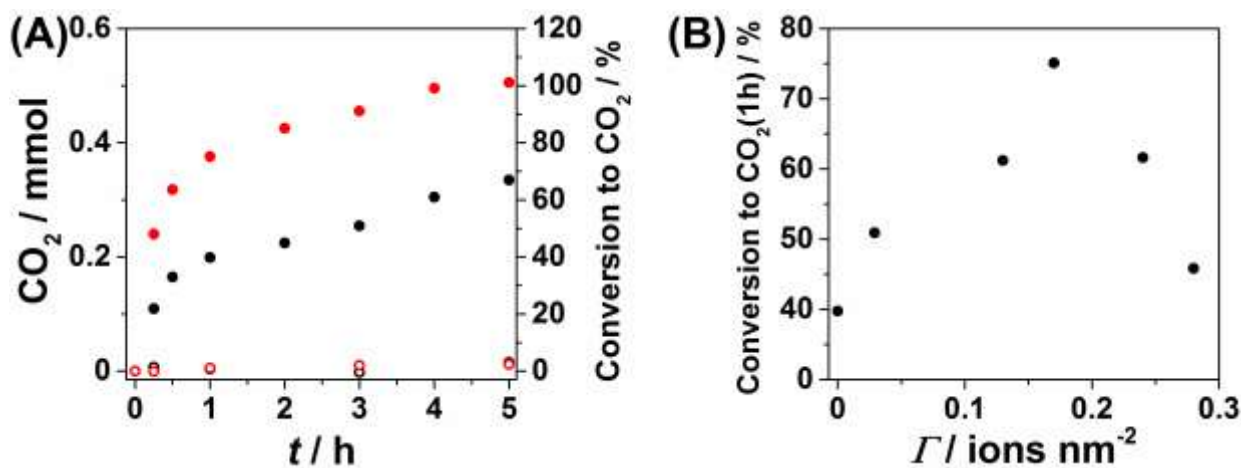

**Fig. S6** (A) Time courses for the  $\text{CO}_2$  generation in the degradation of formic acid under visible-light irradiation at 298 K in the presence of  $\text{TiO}_2$  (black solid circle) and  $\text{Co}_2\text{O}_3(\Gamma = 0.17)/\text{TiO}_2$  (red solid circle), and in the presence of  $\text{TiO}_2$  (black open circle) and  $\text{Co}_2\text{O}_3(\Gamma = 0.17)/\text{TiO}_2$  (red open circle) without formic acid. (B) Plots of conversion to  $\text{CO}_2$  at 1 h vs.  $\Gamma$ .

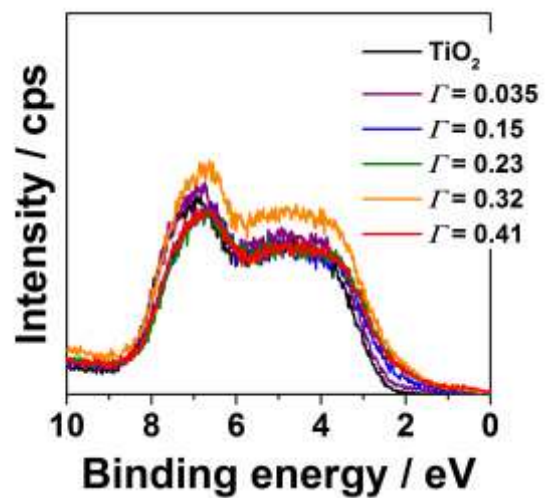

**Fig. S7** Valence-band XPS spectra for  $\text{Co}_2\text{O}_3/\text{TiO}_2$  with varying  $\Gamma$ .

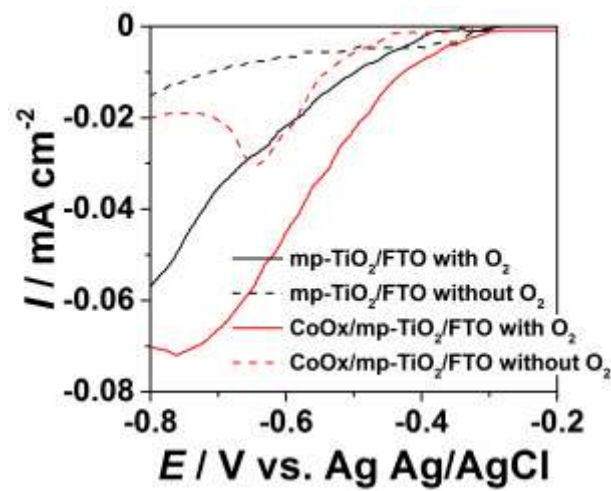

**Fig. S8** Current ( $I/\text{mA}$ )-potential ( $E/\text{V}$  vs.  $\text{Ag}/\text{AgCl}$ ) curves of the  $\text{mp-TiO}_2/\text{FTO}$  electrodes with and without the  $\text{Co}_2\text{O}_3$ -surface modification in a  $0.1 \text{ mol dm}^{-3} \text{ NaClO}_4$  aqueous solution in the dark.
